# Supplementary material for: Water-based fabrication of garnet-based solid electrolyte separators for solid-state lithium batteries
Source: Royal Society of Chemistry journal article supplement (doi:10.1039/d0gc01009j), 2020-01-01
Supplement: d0gc01009j1.pdf [file d0gc01009j1.pdf]

## **Electronic Supplementary Information**

### **Green water-based fabrication of garnet-based solid electrolyte separators for solid-state lithium batteries**

Ruijie Ye,<sup>a,b</sup> Chih-Long Tsai,<sup>a</sup> Martin Ihrig,<sup>a</sup> Serkan Sevinc,<sup>a</sup> Melanie Rosen,<sup>a</sup> Enkhtsetseg Dashjav,<sup>a</sup> Yoo Jung Sohn,<sup>a</sup> Egbert Figgemeier<sup>\*b,c</sup> and Martin Finsterbusch<sup>\*a,c</sup>

<sup>a</sup>. Institute of Energy and Climate Research – Materials Synthesis and Processing (IEK-1), Forschungszentrum Jülich GmbH, 52425 Jülich, Germany.

<sup>b</sup>. Institute for Power Electronics and Electrical Drives (ISEA), RWTH Aachen University, 52066 Aachen, Germany.

<sup>c</sup>. Helmholtz Institute Münster (IEK-12), Forschungszentrum Jülich GmbH, 48149 Münster, Germany.

\*Corresponding authors: Egbert.Figgemeier@isea.rwth-aachen.de (E.F.); m.fensterbusch@fz-juelich.de (M.F.)

#### **This ESI file includes:**

Supplementary Text: Calculation of conductivity; Calculation of the degree of Li<sup>+</sup>/H<sup>+</sup>-exchange and pH of slurry;

Supplementary Figures S1, S2 and S3;

Supplementary Table S1, S2.

## Supplementary Text:

### Calculation of conductivity

The ionic conductivity ( $\sigma$ ) is calculated based on

$$\sigma = \frac{L}{A \times Z}$$

where  $L$  is the thickness and area of solid electrolyte separator,  $A$  is the area of lithium foil electrode, and  $Z$  is the impedance for real axis of the high-frequency semicircle in Nyquist plot (**Fig. 6a**).

In our case:

$$\sigma = \frac{150 [\mu m]}{\pi \times \left(\frac{7 [mm]}{2}\right)^2 \times 256.7 [\Omega]} = 0.15 [mS cm^{-1}]$$

### Calculation of the degree of $Li^+/H^+$ -exchange and pH of slurry

We assume here all Li-loss in sample “LLZ-slurry” (**Table S1**) is caused by  $Li^+/H^+$ -exchange and thus calculate the amount of  $Li^+$  diffusing into the dispersion medium ( $n_{Li^+}$ ) as

$$n_{Li^+} = \left(1 - \frac{Li_{LLZ-slurry}}{Li_{LLZ-AlTa}}\right) \times \frac{m_{LLZ-AlTa}}{M_{LLZ-AlTa}} = \left(1 - \frac{4.42}{6.45}\right) \times \frac{52.40 [g]}{873.02 [g mol^{-1}]} = 0.0189 [mol]$$

where  $Li_{LLZ-slurry}$  and  $Li_{LLZ-AlTa}$  is the number of Li per formula in sample “LLZ-slurry” and stoichiometric Al- and Ta-substituted LLZ (LLZ-Al-Ta), respectively, and  $m_{LLZ-AlTa}$  is the weight of LLZ powder in slurry and  $M_{LLZ-AlTa}$  is molar mass of LLZ-AlTa.

To balance the electric neutrality in slurry, we assume the concentration of  $OH^-$  ( $c_{OH^-}$ ) equals to the concentration of exchanged  $Li^+$  ( $c_{Li^+}$ ):

$$c_{OH^-} = c_{Li^+} = \frac{n_{Li^+}}{m_{water}/\rho_{water}} = \frac{0.0189 [mol]}{43.66 [g]/1.00 [g mL^{-1}]} = 0.433 [mol L^{-1}]$$

where  $m_{water}$  is the weight of water in slurry and  $\rho_{water}$  is the density of water. We here ignore the volume expansion due to the presence of polymers in slurry and make here a rough estimation of the volume of dispersion medium by simply applying the volume of water.

Thus the pH value of the slurry can be obtained as

$$pH = 14 - pOH = 14 + \log_{10} c_{OH^-} = 14 + \log_{10}(0.433 [mol L^{-1}]) = 13.6$$

We can find that the calculated pH value is higher than the measured one (12.5). Therefore, we assume that a large amount of  $OH^-$  is not in the bulk but is adsorbed on the surface of solid particles, providing electrostatic repulsive force to stabilize the suspension.

**Supplementary Figures:**

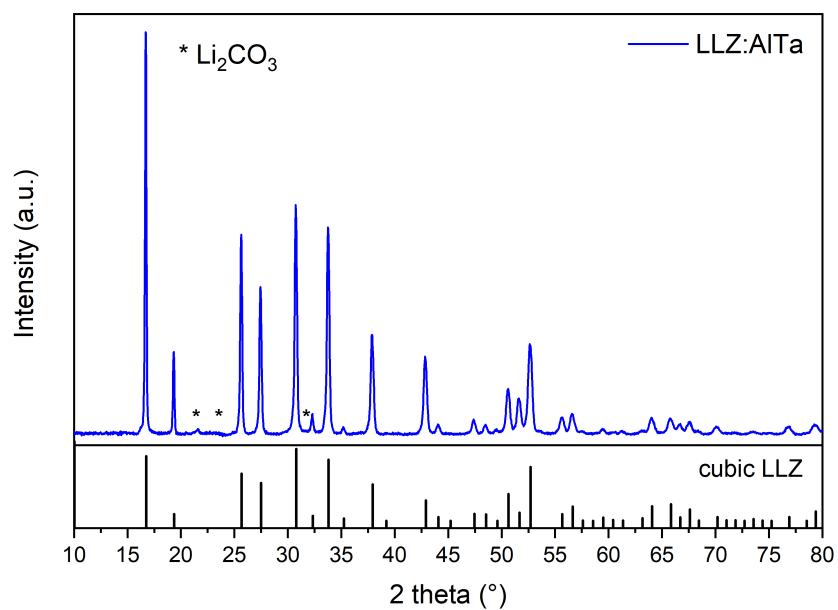

**Figure S1:** XRD pattern of as-synthesized LLZ:AlTa powder.

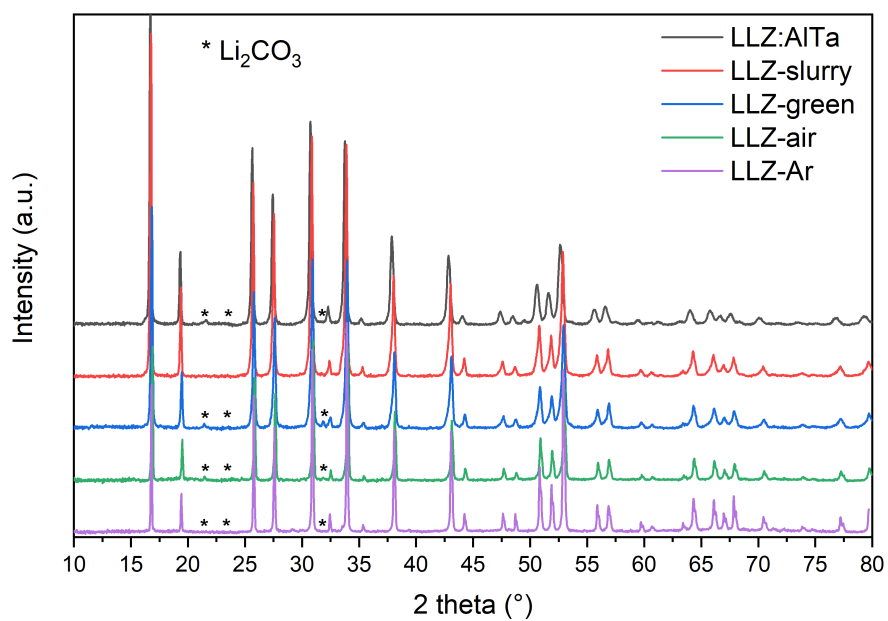

**Figure S2:** XRD patterns of LLZ samples from each step of fabrication procedure. The Rietveld refinements were conducted based on these XRD data.

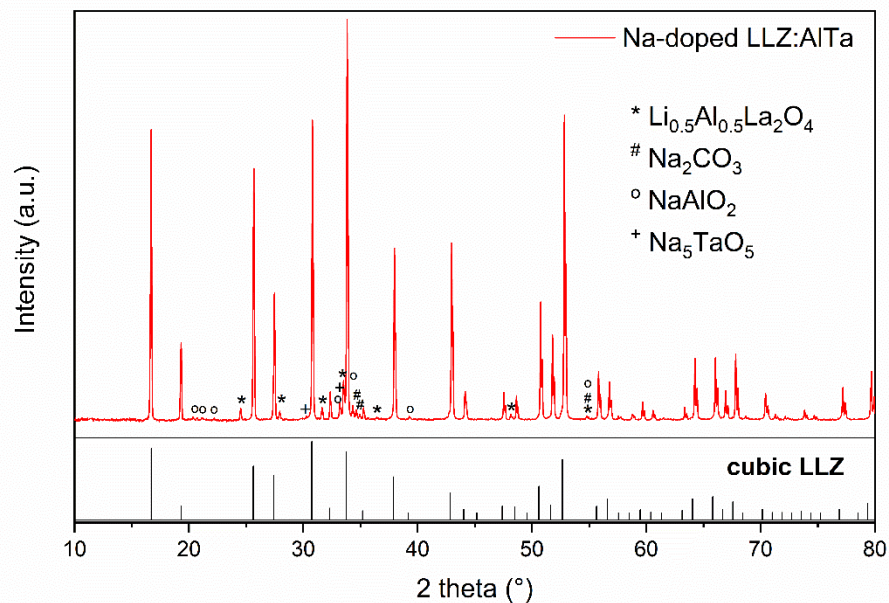

**Figure S3:** XRD pattern of sintered Na-doped LLZ pellet. A mixture of 0.5 g LLZ:AlTa powder and 0.05 g  $\text{Na}_2\text{CO}_3 \cdot \text{H}_2\text{O}$  was pressed into pellet and sintered at 1175 °C for 4 hours. The XRD pattern afterwards shows clearly that  $\text{Na}_2\text{CO}_3$  reacts with LLZ:AlTa to form several secondary phases.

#### Supplementary Table:

**Table S1:** Elemental analysis of LLZ samples from each step of fabrication procedure

|            | Elemental Content (normalized to La) <sup>a</sup> |      |      |      |      |
|------------|---------------------------------------------------|------|------|------|------|
|            | Li                                                | Al   | La   | Zr   | Ta   |
| LLZ:AlTa   | 7.56                                              | 0.07 | 3.00 | 1.53 | 0.37 |
| LLZ-slurry | 4.42                                              | 0.07 | 3.00 | 1.53 | 0.37 |
| LLZ-green  | 7.56                                              | 0.08 | 3.00 | 1.53 | 0.37 |
| LLZ-air    | 6.72                                              | 0.08 | 3.00 | 1.53 | 0.37 |
| LLZ-Ar     | 6.40                                              | 0.08 | 3.00 | 1.52 | 0.40 |

<sup>a</sup> Target composition:  $\text{Li}_{6.45}\text{Al}_{0.05}\text{La}_3\text{Zr}_{1.6}\text{Ta}_{0.4}\text{O}_{12}$

**Table S2:** Calculated values of the EIS data

| Element   | R1 [Ω] | L1      | R2 [Ω] | CPE1 [ $\text{F s}^{-1}$ ] | n1   | R3 [Ω] | CPE2 [ $\text{F s}^{-1}$ ] | n2   |
|-----------|--------|---------|--------|----------------------------|------|--------|----------------------------|------|
| Value     | 143.5  | 2.43E-6 | 113.2  | 1.45E-9                    | 0.95 | 248.4  | 7.89E-4                    | 0.35 |
| Error [%] | 4.22   | 4.56    | 5.60   | 13.28                      | 1.35 | 0.75   | 1.76                       | 0.93 |
